# Supplementary material for: Impaired PSII proteostasis triggers a UPR-like response in the var2 mutant of Arabidopsis
Source: PubMed Central journal article supplement — J Exp Bot. 2019 Apr 16;70(12):3075–88. doi: 10.1093/jxb/erz151 (PMC6598079; doi:10.1093/jxb/erz151), 2019-04-16
Supplement: erz151_suppl_supplementary_figures_s1-s2_table_s1.pdf [file erz151_suppl_supplementary_figures_s1-s2_table_s1.pdf]

## Supplementary Figure S1

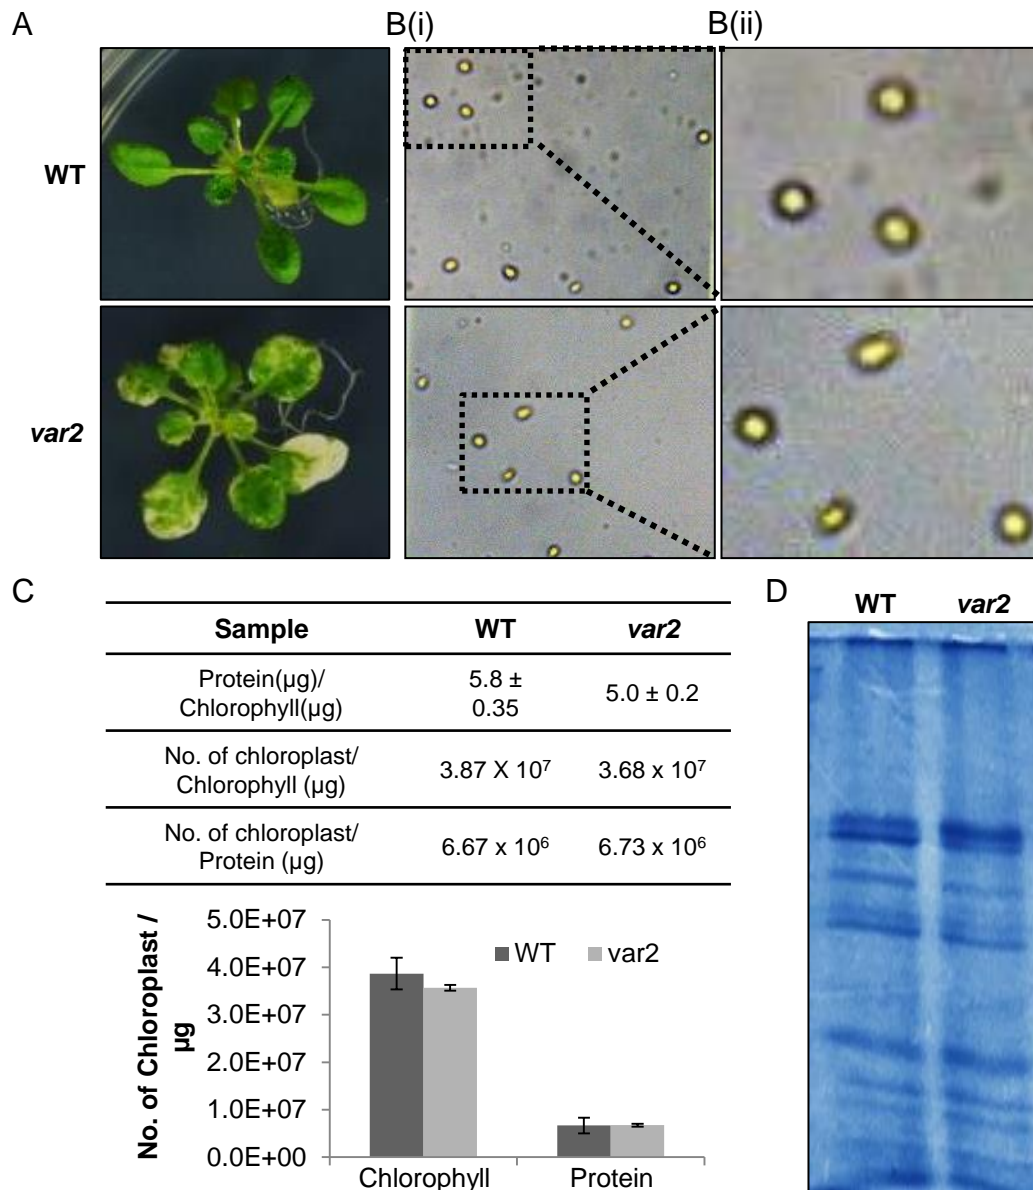

**Fig. S1.** The green sectors of *var2* are almost similar to WT under low light conditions. (A) Plant phenotype of 3-week-old plants used for chloroplast isolation. (B) Integrity of the isolated chloroplasts. [B(i)] Chloroplasts were observed and counted under Phase Contrast microscope using a 10X optical lens (Leica Microsystems). [B(ii)] Enlarged view. (C) Correlation between amounts of chlorophyll and protein chloroplast number. Chloroplast number with respect to protein amounts were consistent in WT and *var2*. (D) SDS-PAGE analysis of proteins isolated from intact chloroplasts. Similar pattern and abundance of major proteins reconfirmed the consistency between protein amounts in WT and *var2*. Equal amounts (20 $\mu$ g) of total chloroplast proteins were loaded for each genotype.

## Supplementary Figure S2

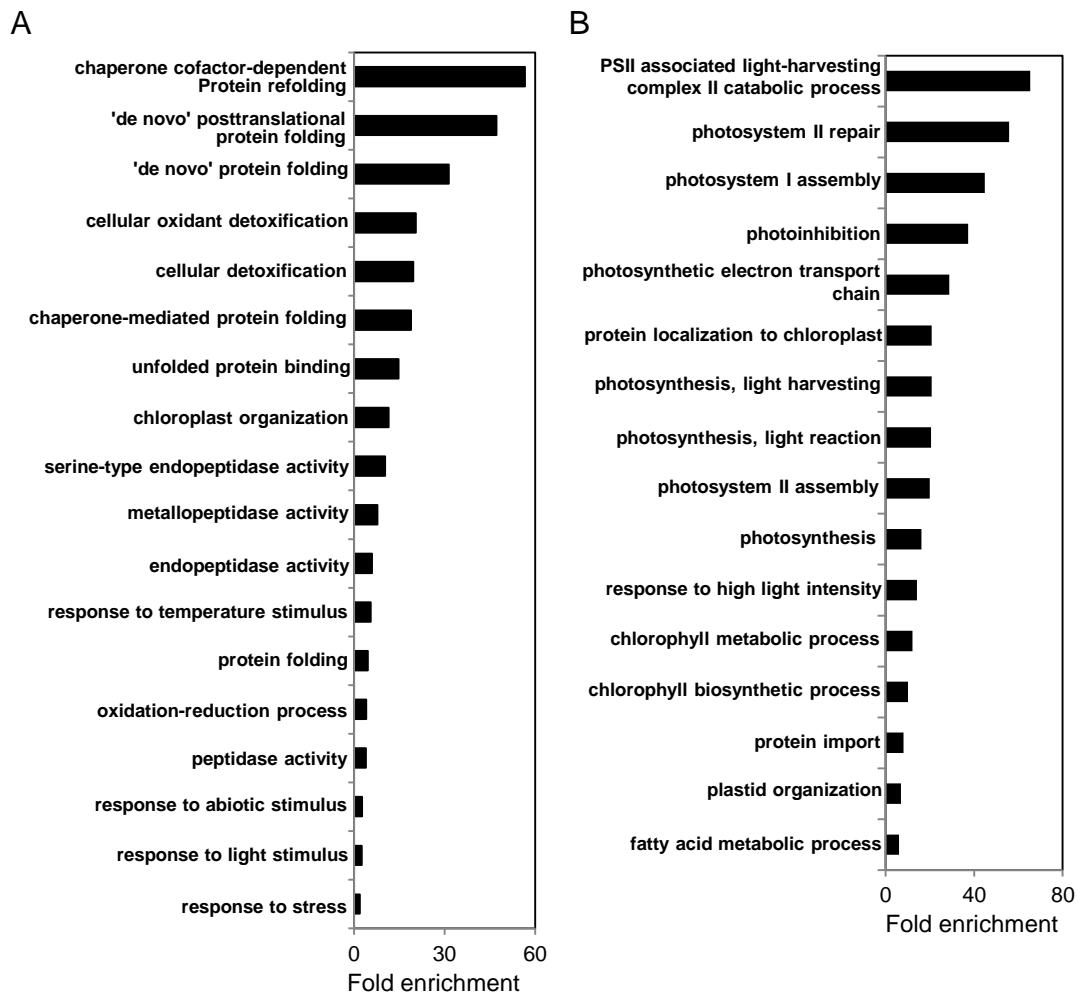

**Fig. S2.** GO analysis revealed an increased accumulation of PQC-related proteins while reduction in the photosynthesis-related proteins in *var2*. (A) Proteins highly accumulated in *var2* showed a significant enrichment of protein folding, proteolysis, detoxification, and chloroplast organization processes. (B) Downregulated proteins exhibited an significant enrichment of photosynthetic protein import, PSI and PSII assembly, PSII repair, photosynthetic electron transport chain (PETC), and chlorophyll biosynthesis. Bar charts shows the fold enrichment of the top 15 GO terms. Complete GO analysis of proteins up- and down-regulated in *var2* are shown in Supplementary Table S4 and Supplementary Table S6, respectively.

**Table S1.** List of primers used in the qRT-PCR analysis.

| Gene ID   | Gene name      | Primer sequence (5' to 3') | Primer length | Product size (bps) |
|-----------|----------------|----------------------------|---------------|--------------------|
| At1g12410 | <i>CLPR2</i>   | F: GAGCGTGTAATCTTCATTGGAC  | 22            | 103                |
|           |                | R: AAATCCTCCTCGAGTCATCAAG  | 22            |                    |
| At4g17040 | <i>CLPR4</i>   | F: TTATGATAAAGCAGCCCATTGC  | 22            | 175                |
|           |                | R: GTGGGACTAAAATATTTTCGGGC | 22            |                    |
| At2g44650 | <i>CPN10</i>   | F: AGGTGGAGTATTGTTGCCTAAA  | 22            | 183                |
|           |                | R: CTCTCTTTACAGAAGCAATGCC  | 22            |                    |
| At3g23990 | <i>CPN60</i>   | F: AAAAGATGGTGTACTGTTGCC   | 22            | 110                |
|           |                | R: CACCAGCAACATCATTAGTAGC  | 22            |                    |
| At4g25100 | <i>FSD1</i>    | F: GAGTTTCACTGGGGAAAACATC  | 22            | 187                |
|           |                | R: TCATTGACTCCCAGAAGAACTC  | 22            |                    |
| At2g28190 | <i>CSD2</i>    | F: GGTGACCTGGGAAACATAAATG  | 22            | 80                 |
|           |                | R: CCAGTCAGAGGAATCTGATTGT  | 22            |                    |
| At3g62030 | <i>CYP20-3</i> | F: TCTATGCAGATGGTTCACACTT  | 22            | 162                |
|           |                | R: CTTAATGGGTGATGCATAGTGC  | 22            |                    |
| At2g26150 | <i>HSFA2</i>   | F: ATGGGTTTGCAGAATGTGAATC  | 22            | 116                |
|           |                | R: CATAGCTGCAACTTGACTCTTG  | 22            |                    |
| At1g13320 | <i>PP2A</i>    | F: GGACCGGAGCCAAGTAGGA     | 19            | 80                 |
|           |                | R: GCTATCCGAAGTTCTGCCTCATT | 23            |                    |
| At4g27670 | <i>HSP21</i>   | F: GAACCAAGGATCAAGTGTC     | 19            | 113                |
|           |                | R: CTAACATTTGTGCGCATCG     | 18            |                    |
| At5g15450 | <i>CLPB3</i>   | CTTGATCATCGGCCGTTTC        | 18            | 123                |
|           |                | CTCTTTTGCAACATCTGG         | 18            |                    |
